# Supplementary material for: On the definition and identifiability of the alleged “hiatus” in global warming
Source: Springer Nature journal article supplement (doi:10.1038/srep16784), 2015-11-24
Supplement: 41598_2015_BFsrep16784_MOESM1_ESM.pdf [file 41598_2015_BFsrep16784_MOESM1_ESM.pdf]

1 Online Supplement for:  
2 On the operationalization and identifiability of the alleged  
3 “hiatus” in global warming

4 Stephan Lewandowsky  
5 University of Bristol and University of Western Australia

6 James S. Risbey  
7 CSIRO Oceans and Atmosphere, Hobart, Tasmania

8 Naomi Oreskes  
9 Harvard University

10  
11 Long-term trend

12 Figure S1 shows the effects of extending the timescales considered in the vantage-  
13 point analysis to include up to 60 years, and the entire instrumental record dating back to  
14 1880. With the perspective provided by adding more vantage years, we see that short term  
15 trends (15 years or less) have always attained large magnitudes (of both signs). The figure  
16 shows that some of the medium term trends (30 years) can also include cooling in the past,  
17 but even those uniformly revert to warming trends when longer duration periods (greater  
18 than 50 years) are considered.

19 Autocorrelations

20 Climatological time series frequently exhibit autocorrelations, which render the sig-  
21 nificance levels of ordinary least squares regression (OLS) too liberal, thereby increasing  
22 the chances of a Type I error (i.e., detecting a trend when none is present). The IPCC rec-  
23 ommends several possible solutions to the problem (Hartmann et al., 2013), two of which  
24 were explored here.

25 *Generalized least squares*

26 We replaced OLS with a generalized least squares (GLS) analysis in which the cor-  
27 relation among residuals was modeled using an AR1 process. Because estimation of auto-  
28 correlations is impossible or fraught with difficulty for short time series, we repeated the  
29 vantage-point analysis reported in Figure 3 in the main article with a minimum of 5 years  
30 included in the trend analysis. The results are shown in Figure S2. The pattern replicates  
31 the analysis in Figure 3 in the main article except that owing to the modeling of autocor-  
32 relations, now 19 (rather than 17) years are required to ensure significance at all vantage  
33 points.

34 *Prewhitening of time series*

35 An alternative means of dealing with autocorrelations is to apply OLS to the entire  
36 time series (in this case the period 1960–2014) and to adjust the raw time series using  
37 the overall time-lagged (i.e., AR1) correlation (Hartmann et al., 2013). Subsequent trend  
38 analysis on the adjusted time series is then done via OLS. This approach has the advantage  
39 that the autocorrelation is estimated once, using all available data, before trends of varying  
40 durations are computed by OLS, as in our main analysis underlying Figure 3 in the article.

41 The results of prewhitening are shown in Figure S3. The pattern replicates the  
42 analysis in Figure 3 in the main article except that owing to the prewhitening, now 19  
43 (rather than 17) years are required to ensure significance at all vantage points.

## 44 Generalizing to other GMST data sets

45 We repeated the main landscaping analysis (Figure 3 in the article and Figures S2  
46 and S3) using an alternative data set created by Cowtan and Way (2014). This data set is  
47 based on the U.K. Met Office’s HadCRUT4 data set (Morice, Kennedy, Rayner, & Jones,  
48 2012), but corrects for known coverage gaps in HadCRUT4, especially in the Arctic where  
49 warming is known to be most rapid. The data set by Cowtan and Way (2014) fills those  
50 gaps by mathematical interpolation (e.g., kriging).

51 The data of Cowtan and Way (2014) exhibit a slightly delayed onset of the upswing  
52 of temperature characteristic of the era of modern global warming compared to GISS.  
53 Accordingly, for this analysis we computed all possible trends from 1965 onward (as opposed  
54 to 1960 for GISS), to avoid “edge effects” for earlier vantage years.

55 Figure S4 shows the landscape of significance values for the data of Cowtan and Way  
56 (2014). The three panels in the figure report significance for ordinary least squares, gener-  
57 alized least squares, and prewhiting, respectively. The data support the same conclusions  
58 that we drew from analysis of GISS.

## 59 References

- 60 Cowtan, K., & Way, R. G. (2014). Coverage bias in the HadCRUT4 temperature series and its  
61 impact on recent temperature trends. *Quarterly Journal of the Royal Meteorological Society*,  
62 *140*, 1935–1944. doi: 10.1002/qj.2297
- 63 Hansen, J., Ruedy, R., Sato, M., & Lo, K. (2010). Global surface temperature change. *Reviews of*  
64 *Geophysics*, *48*, RG4004. doi: 10.1029/2010RG000345
- 65 Hartmann, D., KleinTank, A., Rusticucci, M., Alexander, L., Bronnimann, S., Charabi, Y., ...  
66 Zhai, P. (2013). Observations: Atmosphere and surface. In T. Stocker et al. (Eds.),  
67 *Climate change 2013: The physical science basis. contribution of Working Group I to the*  
68 *Fifth Assessment Report of the Intergovernmental Panel on Climate Change* (pp. 159–254).  
69 Cambridge, United Kingdom and New York, NY, USA: Cambridge University Press. doi:  
70 10.1017/CBO9781107415324.008
- 71 Morice, C. P., Kennedy, J. J., Rayner, N. A., & Jones, P. D. (2012). Quantifying uncertainties in  
72 global and regional temperature change using an ensemble of observational estimates: The  
73 HadCRUT4 data set. *Journal of Geophysical Research: Atmospheres*, *117*, D08101. doi:  
74 10.1029/2011JD017187

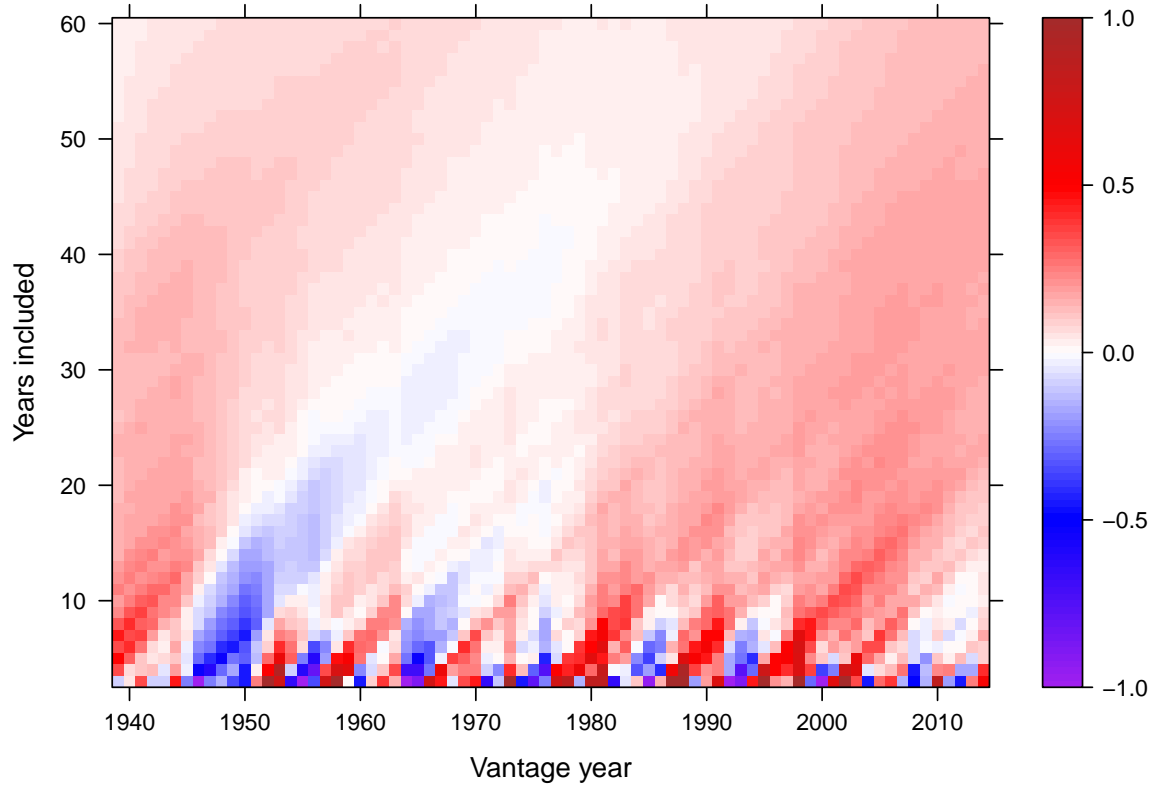

*Figure S1.* : Observed magnitude of global mean surface temperature (GMST) anomalies estimated by NASA's Goddard Institute for Space Studies (GISS) data set (Hansen et al., 2010; <http://data.giss.nasa.gov/gistemp/>, all analyses based on dataset downloaded on 17 January 2015) as a function of vantage year (1939–2014) and the number of years included in the computation of the trend by ordinary least squares analysis. Trends are expressed in  $K/decade$  and are capped at  $\pm 1K$  for plotting. For each vantage year, trends are computed for all possible windows between 3 and 60 years duration, all of which end with the particular vantage year. The entire instrumental record (1880–2014) contributes to this analysis.

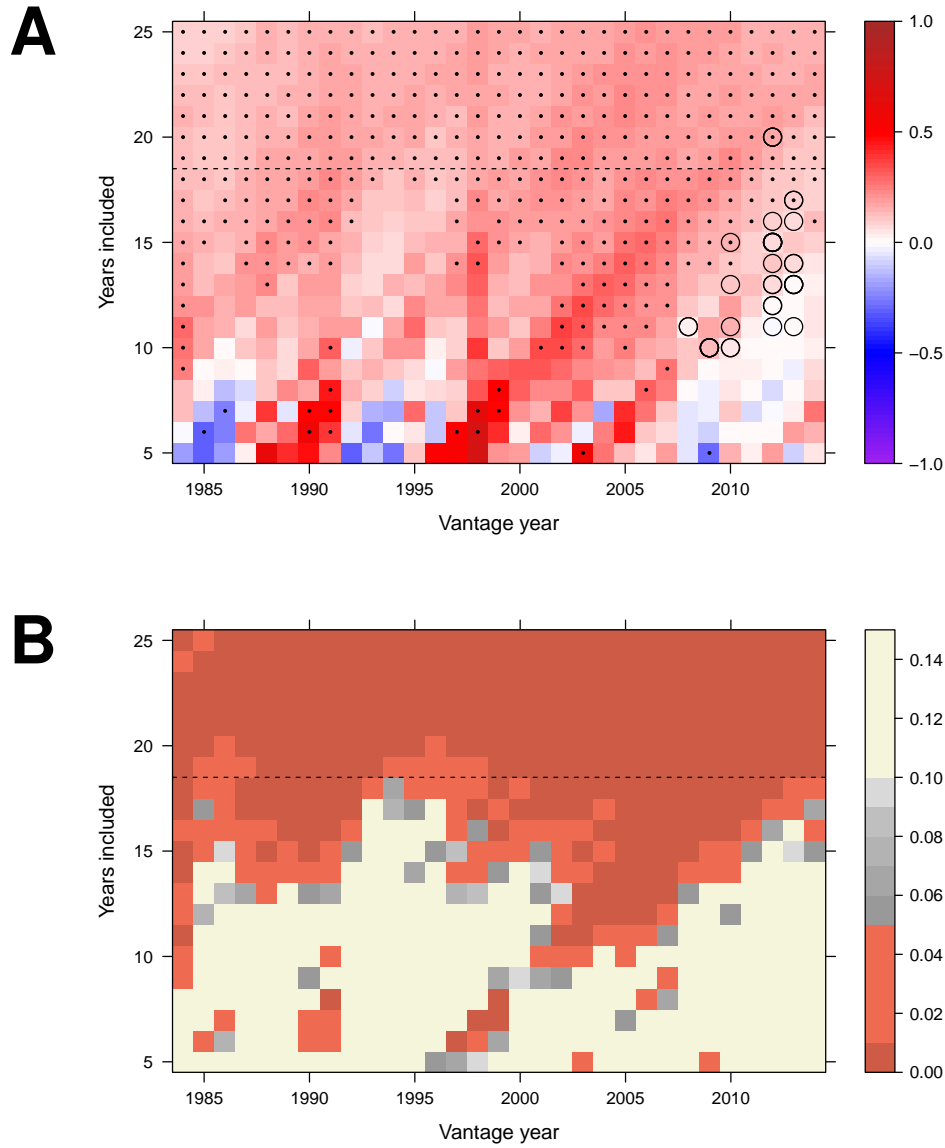

Figure S2. : **A**: Observed magnitude of temperature trends (GISS, K/decade) as a function of vantage year and the number of years included in the computation of the trend by generalized least squares analysis with autocorrelation among residuals modeled by an AR1 process as recommended by the IPCC (Hartmann et al., 2013). Trends are capped at  $\pm 1K$  for plotting. For each vantage year, trends are computed for all possible windows between 5 and 25 years duration, all of which end with the particular vantage year. The dots indicate which trends are significant ( $p < .05$ ), and the horizontal dashed line indicates the number of years that must be included ( $N = 19$ ) for the trend to be significant from all vantage points. The open circles identify combinations of onset and duration that have been used to identify the “hiatus” by articles in the corpus. Multiple articles may contribute to a given circle. **B**: Level of statistical significance for trends (GISS, K/decade) as a function of vantage year and the number of years included in the computation of the trend as in panel A. Trends that are clearly non-significant ( $p > .10$ ) are shown in beige, those that approach significance ( $.05 < p < .10$ ) are shown in shades of gray, and significant trends ( $p < .05$ ) are shown in shades of terracotta.

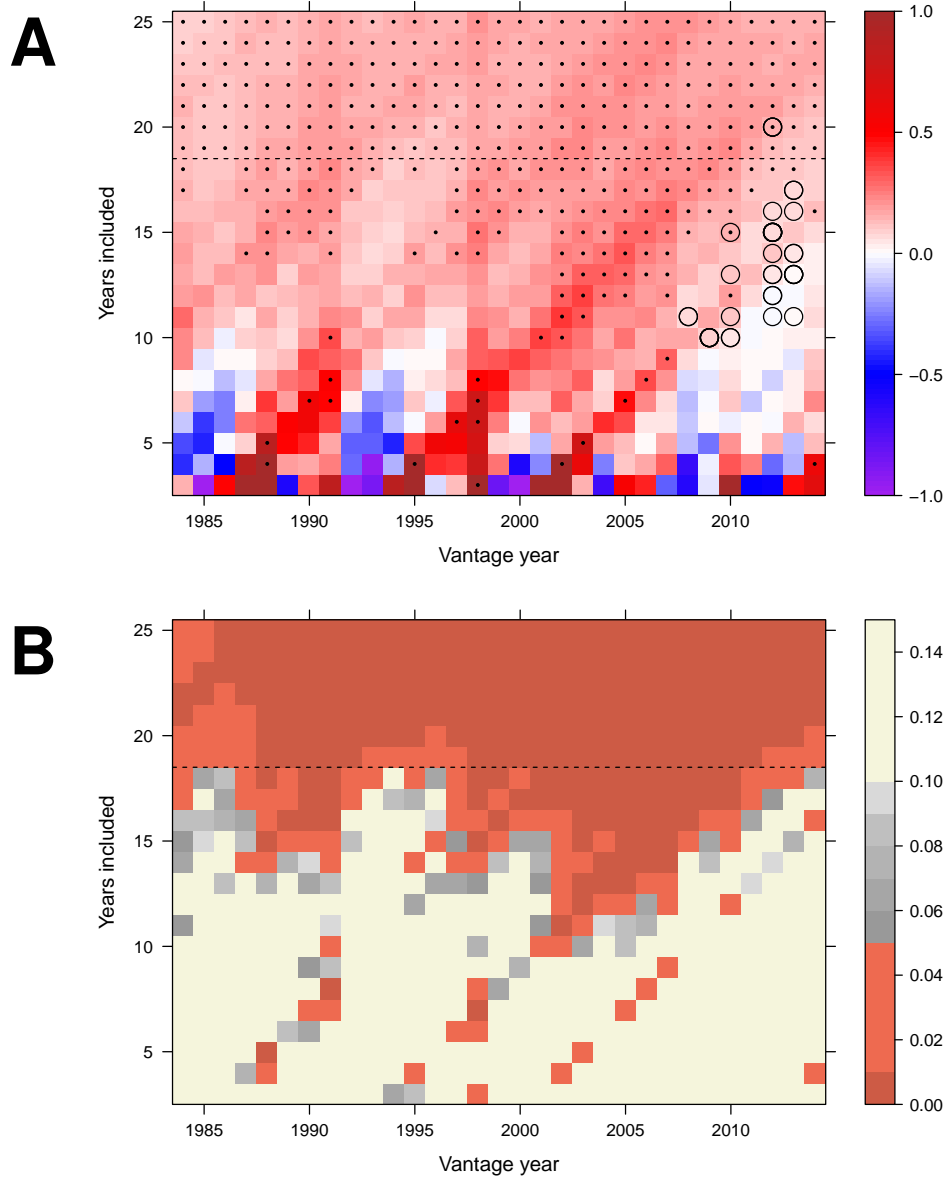

Figure S3. : **A**: Observed magnitude of temperature trends (GISS, K/decade) as a function of vantage year and the number of years included in the computation of the trend by ordinary least squares analysis on a prewhitened time series. See text for details on prewhitening. Trends are capped at  $\pm 1K$  for plotting. For each vantage year, trends are computed for all possible windows between 3 and 25 years duration, all of which end with the particular vantage year. The dots indicate which trends are significant ( $p < .05$ ), and the horizontal dashed line indicates the number of years that must be included ( $N = 19$ ) for the trend to be significant from all vantage points. The open circles identify combinations of onset and duration that have been used to identify the “hiatus” by articles in the corpus. Multiple articles may contribute to a given circle. **B**: Level of statistical significance for trends (GISS, K/decade) as a function of vantage year and the number of years included in the computation of the trend as in panel A. Trends that are clearly non-significant ( $p > .10$ ) are shown in beige, those that approach significance ( $.05 < p < .10$ ) are shown in shades of gray, and significant trends ( $p < .05$ ) are shown in shades of terracotta.

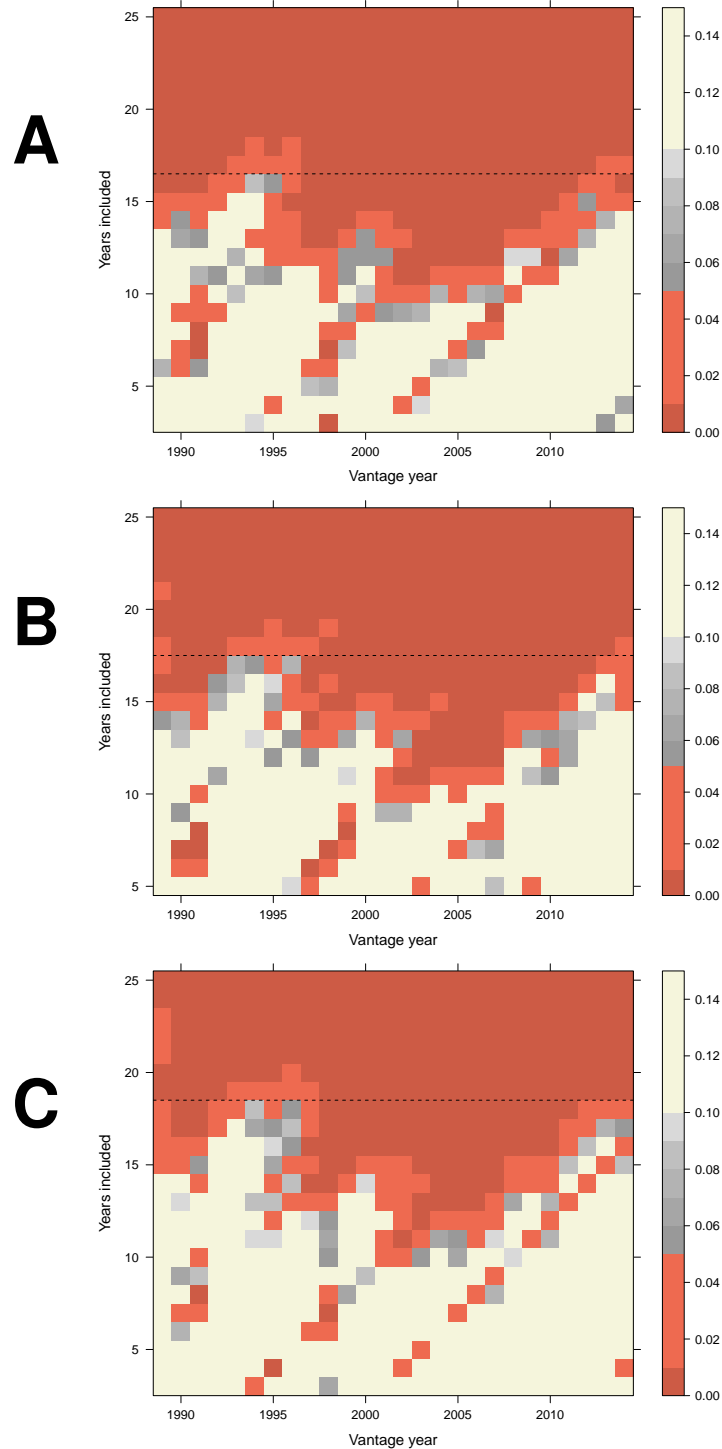

Figure S4. : All panels show the level of statistical significance for trends (K/decade, based on data of Cowtan & Way, 2014) as a function of vantage year and the number of years included in the computation of the trend. Trends that are clearly non-significant ( $p > .10$ ) are shown in beige, those that approach significance ( $.05 < p < .10$ ) are shown in shades of gray, and significant trends ( $p < .05$ ) are shown in shades of terracotta. Panels differ with respect to modeling of autocorrelations in the time series. **A**: Ordinary least squares analysis. **B**: Generalized least squares analysis with autocorrelation among residuals modeled by an AR1 process as recommended by the IPCC (Hartmann et al., 2013). **C**: Ordinary least squares analysis on a prewhitened time series. See text for details on prewhitening.
